# Supplementary material for: NFκB Promotes Ovarian Tumorigenesis via Classical Pathways That Support Proliferative Cancer Cells and Alternative Pathways That Support ALDH+ Cancer Stem–like Cells
Source: Oxford University Press journal article supplement (doi:10.1158/0008-5472.can-17-0366), 2017-10-26
Supplement: 00085472can170366-sup-178572_3_supp_4282386_zwl75b.docx [file 00085472can170366-sup-178572_3_supp_4282386_zwl75b.docx]

**Supplemental Table 1**. **Ovarian cancer cell line characteristics**

|  | **ACI23** | **OVCAR5** | **OVCAR8** | **OV90** | **CAOV3** | **VTCF** | **TGS1** | **TGS4** |
| --- | --- | --- | --- | --- | --- | --- | --- | --- |
| **source** | J.I. Risinger, MSU | NCI-60 | NCI-60 | ATCC | ATCC | CCR, NCI | CCR, NCI | CCR, NCI |
| **Tissue site** | Primary tumor | ascites | Primary tumor | ascites | Primary tumor | ascites | ascites | ascites |
| **P53 status** | WT | absent | (Y126-K132) | S215R | Q136stop | unknown | unknown | unknown |
| **Histology at diagnosis** | Low grade  serous | adenoca | High grade serous | adenoca | adenoca | High  grade  serous | High grade  serous | High  grade  serous |
